# Supplementary material
Source: Springer Nature journal article supplement (https://www.springermedizin.de/resource/supplementary/12943_2012_1102_MOESM17_ESM.pdf/9552504)

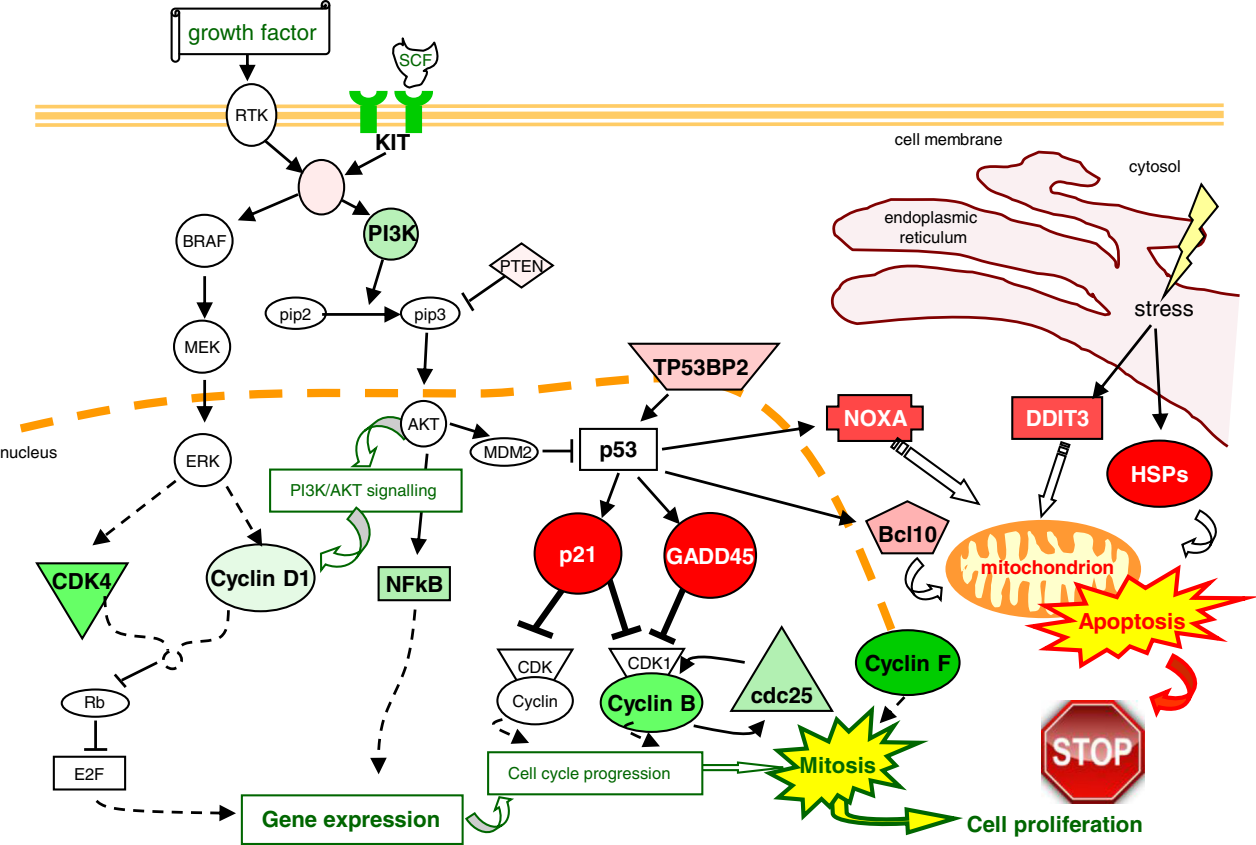

Supplement: MOESM17 [file 9552504]
